# Supplementary material for: Anorexia Reduces GFAP+ Cell Density in the Rat Hippocampus
Source: Hindawi journal article supplement (doi:10.1155/2016/2426413), 2016-01-01
Supplement: f1 [file 2426413.f1.pdf]

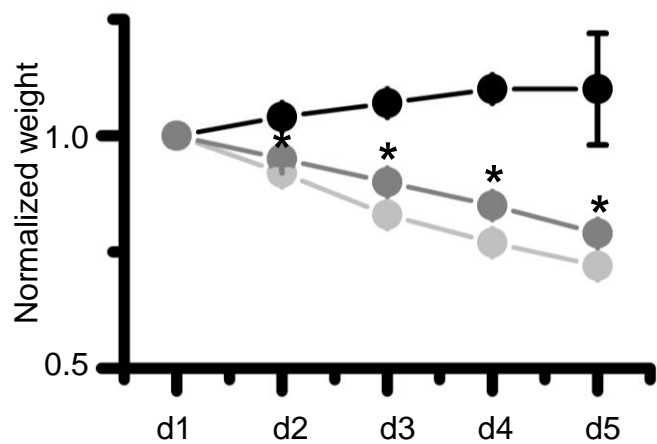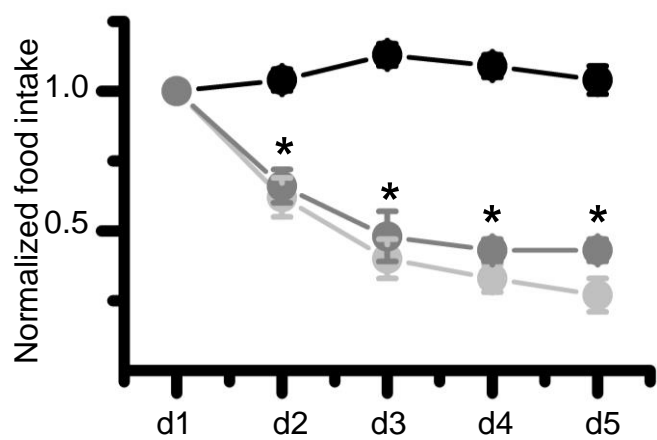

Supplemental Fig. 1
